# Supplementary material
Source: PubMed Central journal article supplement (PMC7116837)
Supplement: EMS114721-supplement-Peer_reviews.pdf [file EMS114721-supplement-Peer_reviews.pdf]

## Peer Review Information

---

**Journal:** Nature Microbiology

**Manuscript Title:** Structure of Trypanosome Coat Protein VSG<sub>sur</sub> and Function in Suramin Resistance

**Corresponding author name(s):** Erec Stebbins

## Reviewer Comments & Decisions:

### Decision Letter, initial version:

Dear Erec,

Thank you for your patience while your manuscript "A Parasite Coat Protein Binds Suramin to Confer Drug Resistance" was under peer-review at Nature Microbiology. It has now been seen by 4 referees, whose expertise and comments you will find at the end of this email. You will see from their comments below that while they find your work of interest, some important points are raised. We are very interested in the possibility of publishing your study in Nature Microbiology, but would like to consider your response to these concerns in the form of a revised manuscript before we make a final decision on publication.

We are committed to providing a fair and constructive peer-review process. Do not hesitate to contact us if there are specific requests from the reviewers that you believe are technically impossible or unlikely to yield a meaningful outcome.

If you have not done so already please begin to revise your manuscript so that it conforms to our Article format instructions at <http://www.nature.com/nmicrobiol/info/final-submission/>

The usual length limit for a Nature Microbiology Article is six display items (figures or tables) and 3,000 words. We have some flexibility, and can allow a revised manuscript at 3,500 words, but please consider this a firm upper limit. There is a trade-off of ~250 words per display item, so if you need more space, you could move a Figure or Table to Supplementary Information.

Some reduction could be achieved by focusing any introductory material and moving it to the start of your opening 'bold' paragraph, whose function is to outline the background to your work, describe in a sentence your new observations, and explain your main conclusions. The discussion should also be limited. Methods should be described in a separate section following the discussion, we do not place a word limit on Methods.

Nature Microbiology titles should give a sense of the main new findings of a manuscript, and should not contain punctuation. Please keep in mind that we strongly discourage active verbs in titles, and that they should ideally fit within 90 characters each (including spaces).

We strongly support public availability of data. Please place the data used in your paper into a public data repository, if one exists, or alternatively, present the data as Source Data or Supplementary Information. If data can only be shared on request, please explain why in your Data Availability Statement, and also in the correspondence with your editor. For some data types, deposition in a public repository is mandatory - more information on our data deposition policies and available repositories can

be found at <https://www.nature.com/nature-research/editorial-policies/reporting-standards#availability-of-data>.

Please include a data availability statement as a separate section after Methods but before references, under the heading "Data Availability". This section should inform readers about the availability of the data used to support the conclusions of your study. This information includes accession codes to public repositories (data banks for protein, DNA or RNA sequences, microarray, proteomics data etc...), references to source data published alongside the paper, unique identifiers such as URLs to data repository entries, or data set DOIs, and any other statement about data availability. At a minimum, you should include the following statement: "The data that support the findings of this study are available from the corresponding author upon request", mentioning any restrictions on availability. If DOIs are provided, we also strongly encourage including these in the Reference list (authors, title, publisher (repository name), identifier, year). For more guidance on how to write this section please see: <http://www.nature.com/authors/policies/data/data-availability-statements-data-citations.pdf>

To improve the accessibility of your paper to readers from other research areas, please pay particular attention to the wording of the paper's opening bold paragraph, which serves both as an introduction and as a brief, non-technical summary in about 150 words. If, however, you require one or two extra sentences to explain your work clearly, please include them even if the paragraph is over-length as a result. The opening paragraph should not contain references. Because scientists from other sub-disciplines will be interested in your results and their implications, it is important to explain essential but specialised terms concisely. We suggest you show your summary paragraph to colleagues in other fields to uncover any problematic concepts.

If your paper is accepted for publication, we will edit your display items electronically so they conform to our house style and will reproduce clearly in print. If necessary, we will re-size figures to fit single or double column width. If your figures contain several parts, the parts should form a neat rectangle when assembled. Choosing the right electronic format at this stage will speed up the processing of your paper and give the best possible results in print. We would like the figures to be supplied as vector files - EPS, PDF, AI or postscript (PS) file formats (not raster or bitmap files), preferably generated with vector-graphics software (Adobe Illustrator for example). Please try to ensure that all figures are non-flattened and fully editable. All images should be at least 300 dpi resolution (when figures are scaled to approximately the size that they are to be printed at) and in RGB colour format. Please do not submit Jpeg or flattened TIFF files. Please see also 'Guidelines for Electronic Submission of Figures' at the end of this letter for further detail.

Figure legends must provide a brief description of the figure and the symbols used, within 350 words, including definitions of any error bars employed in the figures.

When submitting the revised version of your manuscript, please pay close attention to our [Digital Image Integrity Guidelines](https://www.nature.com/nature-research/editorial-policies/image-integrity) and to the following points below:

- that unprocessed scans are clearly labelled and match the gels and western blots presented in figures.
- that control panels for gels and western blots are appropriately described as loading on sample processing controls
- all images in the paper are checked for duplication of panels and for splicing of gel lanes.

Finally, please ensure that you retain unprocessed data and metadata files after publication, ideally archiving data in perpetuity, as these may be requested during the peer review and production process or after publication if any issues arise.

Please include a statement before the acknowledgements naming the author to whom correspondence and requests for materials should be addressed.

Finally, we require authors to include a statement of their individual contributions to the paper -- such as experimental work, project planning, data analysis, etc. -- immediately after the acknowledgements. The statement should be short, and refer to authors by their initials. For details please see the Authorship section of our joint Editorial policies at [http://www.nature.com/authors/editorial\\_policies/authorship.html](http://www.nature.com/authors/editorial_policies/authorship.html)

When revising your paper:

- \* include a point-by-point response to any editorial suggestions and to our referees. Please include your response to the editorial suggestions in your cover letter, and please upload your response to the referees as a separate document.

- \* ensure it complies with our format requirements for Letters as set out in our guide to authors at [www.nature.com/nmicrobiol/info/gta/](http://www.nature.com/nmicrobiol/info/gta/)

- \* state in a cover note the length of the text, methods and legends; the number of references; number and estimated final size of figures and tables

- \* resubmit electronically if possible using the link below to access your home page:

{REDACTED}

- \*This url links to your confidential homepage and associated information about manuscripts you may have submitted or be reviewing for us. If you wish to forward this e-mail to co-authors, please delete this link to your homepage first.

Please ensure that all correspondence is marked with your Nature Microbiology reference number in the subject line.

Nature Microbiology is committed to improving transparency in authorship. As part of our efforts in this direction, we are now requesting that all authors identified as 'corresponding author' on published papers create and link their Open Researcher and Contributor Identifier (ORCID) with their account on the Manuscript Tracking System (MTS), prior to acceptance. This applies to primary research papers only. ORCID helps the scientific community achieve unambiguous attribution of all scholarly contributions. You can create and link your ORCID from the home page of the MTS by clicking on 'Modify my Springer Nature account'. For more information please visit [www.springernature.com/orcid](http://www.springernature.com/orcid).

We hope to receive your revised paper within three weeks. If you cannot send it within this time, please let us know.

We look forward to hearing from you soon.

\*\*\*\*\*

Reviewer Expertise:

Referee #1: VSG antigenic variation, trypanosomes  
Referee #2: VSG, African trypanosomes  
Referee #3: -  
Referee #4: X-ray crystallography, suramin structure

Reviewers Comments:

Reviewer #1 (Remarks to the Author):

African trypanosomes are protected by a very dense layer of Variant Surface Glycoprotein (VSG), which shields the parasite from the immune system, and is antigenically varied during the course of an infection. This manuscript by Zeelen et al presents a detailed structural analysis of an unusual VSG variant (VSG<sub>sur</sub>) which binds the trypanosome drug suramin, thereby conferring drug resistance. This unusual finding is investigated in detail in this study, and the experiments appear to be robust. I think that this study would be found very interesting by the broader microbiology community interested in host pathogen interactions as well as mechanisms of microbial drug resistance.

I think that determining the structures of a large range of different VSGs is a very exciting enterprise, as it helps us understand the interface between the pathogen and the host. I think that probing the structures of these VSGs, and investigating how they can bind different ligands is an exciting area of research. One could hypothesise that VSGs originally evolved from surface receptors involved in nutrient uptake. It is therefore conceivable that at least some of these VSGs can still bind different ligands. VSG binding to suramin is of course an artificial situation, and VSGs would not have evolved to bind it. However, this system still allows probing of different VSG structures, and can give insight into different biological processes operating within trypanosomes. In addition, this represents an unusual, and very interesting drug resistance mechanism. It is striking that selection at higher suramin concentrations produced VSG<sub>sur</sub> supermutants, as well as some other yet unidentified changes in the selected cells.

I have a few queries rather than criticisms.

Suramin appears to accumulate in the lysosome in VSG<sub>sur</sub> expressing cells. Is this because the VSG<sub>sur</sub>-

suramin complex has failed VSG quality control, and the whole complex is targeted for degradation? Alternatively, do the authors think that VSGsur has suramin stripped off of it when it is internalised during recycling and that suramin ends up in the lysosome separate from VSG?

In the first scenario, the VSG half-life of VSGsur should be shorter in the presence of suramin compared with in its absence. Have the authors investigated VSG half-life in these different scenarios? One could speculate that the binding of VSGsur to suramin might affect how it is treated by the VSG recycling machinery and its rate of degradation.

I think that these studies looking at how different ligands bind VSGs could give fascinating insight into exactly what is or is not recognised by the VSG quality control mechanism operating during VSG recycling.

The authors mention that there is no defect in rate of trafficking in the VSGsur expressing strains, but I think that rate of trafficking is a separate point from VSG half-life.

A minor point is that I think that the title would be improved if it was a bit more detailed as it is a bit cryptic at the moment. Maybe say what the coat protein is? And the parasite?

Reviewer #2 (Remarks to the Author):

The nice thing about structural biology manuscripts is that the data usually leave little room for interpretation. A crystal is a crystal. In this case it is a co-crystal of a variable surface protein of trypanosomes and suramin, a substance used against the sleeping sickness caused by trypanosomes. In a previous work, it was reported that the expression of a certain VSG is associated with a 90-fold increase in suramin resistance of the parasites. However, the mechanistic basis for this resistance remained unclear. Here, the authors show that VSGsur directly binds suramin. They show that this happens between the monomers and not, as one might assume, in the region of the N-terminal variable loops. Mutations in the area of the contact points of drug and protein lead to loss of binding and resistance. This work also examines and rejects the possibility that an altered endocytosis rate causes suramin resistance. VSGsur, like another VSG reported here, has an unusual structure, which makes it clear that not all VSGs have the same blueprint. Overall, the manuscript describes a fascinating observation. All experiments are logical and very well documented. But of course, there are a few points and questions that the authors might consider.

The hypothesis that VSGsur functions as a suramin sponge is interesting. However, I would invite the authors to provide some simple calculations to estimate if this is theoretically possible. Each cell has about  $5 \times 10^6$  VSG-dimers, so each cell can bind at most the same amount of suramin. If in theory the order of magnitude were feasible, then it should be possible to titrate the resistance to a threshold value that could be calculated from the cell concentration (ignoring binding constants etc.).

The discussion would benefit from being more precise and less speculative. Speculation is fine if it has a factual basis. Interestingly, there are also alternative binding sites in co-crystals, as well as mutations outside the main binding site, which increased resistance to suramine. The authors say that other "factors" are probably involved here. They speak of "supermutants", which is striking but not really scientific. If a replacement mutation does not yield the hoped-for success, it should not be called a "pseudo-clone", because that too is not scientifically useful.

The kinetic experiments on endocytosis were carried out over a longer period of time, although it is known that the linear measuring range is quite short. The first measurement point of the dextran intake is 10 minutes. Earlier differences in the kinetics are not measured in this way, but this is important for the statement. The method used does not appear to have the resolution required for making sound statements. Therefore, the validity of the data at this point would be questionable.

Reviewer #3 (Remarks to the Author):

The variant surface glycoprotein coat of *Trypanosoma brucei* has a variety of functions. Key among them are protection of the parasite from attack by the host's immune system and the ability to accommodate other surface proteins such as transporters. In addition to the many VSG genes encoded by trypanosomes, other members of this family have evolved as receptors or as a means of neutralizing host lytic factors.

A number of VSG structures have been determined previously, including by the authors of this paper. Although these share salient features, increasing the number of solved structures has revealed interesting differences that shed useful light on trypanosome biology. In this context, this is not "just one more"; it highlights the flexibility that trypanosomes can achieve in the structure and function of this protein.

In this manuscript the authors determine the structure of a particular VSG, VSG<sub>sur</sub>, which correlates with increased resistance to the trypanocidal drug suramin. They elegantly show that VSG<sub>sur</sub> is one member of a VSG sub-family with new features, but it is unique among them in its ability to bind suramin. They also dissect the interactions between the drug and the protein by creating mutants and isolating supermutants, as well as showing (indirectly) that the high level of resistance is not solely due to the VSG, but to additional, as yet unidentified, changes in the original cell line and cell lines that were further selected.

I enjoyed reading this manuscript – as much for its honesty as for the quality of the data. The authors clearly show that suramin binding is required for resistance, but cannot say with certainty how this is achieved. This does not detract from this work, rather it sets the scene for the next chapter.

There are only minor points that need to be addressed:

1. Supplementary figure 1: The schematic drawing is a bit confusing for readers unfamiliar with VSG primary structure. The signal peptide looks huge; the CTD/GPI addition sites are actually separate entities – there is a C-terminal peptide that is cleaved when the GPI is added.

2. p12: Growth of mutants. The sentence beginning "both mutants were viable...." is confusing. I assume that the growth rate of 8.5h refers to the N130A mutant. The growth of H122A is also supposedly slower. There are standard deviations on the graph. Please include these in the population doubling time to show that there is a significant difference.

3. Supplementary figure 4. 130A and 122A. It would be preferable to name them according to the mutation e.g. H122A. The figure legend refers to D130A, text to N130A. I assume the latter is correct,

since it was designed to destroy the glycosylation site.

4. Supplementary figure 8. The new VSG is flanked by 5'UTR sequences on both sides. Is this really the case or should one of them be 3'UTR?

5. Supplementary figure 11. Can the authors explain the 2-3x variation in IC50 for replicates of the same cell line?

Reviewer #4 (Remarks to the Author):

"A Parasite Coat Protein Binds Suramin to Confer Drug Resistance" by Dr Stebbins and colleagues.

Details presented in the main-body of the manuscript, the figure legends, supplementary materials section and in the PDB validation reports clearly indicate that all aspects of the X-ray diffraction data collection/reduction, structure determination and refinement procedures have been conducted correctly. The stereochemistry of the three-dimensional models and are very good and are based on careful interpretation of the electron density maps. The conclusions arrived at are valid.

#### Author Rebuttal to Initial comments

Reviewer #1 (Remarks to the Author):

We were heartened by the reviewer's words that our "robust" and "exciting" study "would be found very interesting by the broader microbiology community interested in host pathogen interactions as well as mechanisms of microbial drug resistance."

The reviewer also has several well thought out queries, which we attempt to answer below.

**(1) Suramin appears to accumulate in the lysosome in VSGsur expressing cells. Is this because the VSGsur-suramin complex has failed VSG quality control, and the whole complex is targeted for degradation? Alternatively, do the authors think that VSGsur has suramin stripped off of it when it is internalised during recycling and that suramin ends up in the lysosome separate from VSG?**

We have reworked considerably our model for how VSGsur binding suramin contributes to resistance. We have dropped the "sponge" description (although still consider it useful) in favor of simply describing how newly synthesized VSGsur could bind internalized suramin from other pathways (e.g., ISG75 and LDL) and prevent its trafficking in the cell (to wherever toxicity is exerted – something not yet established). We show that using known measurements of VSG synthesis and suramin internalization, we can account for the resistance levels (e.g., IC50 values) we are measuring.



In this model, we hypothesize that VSGsur does not lose suramin in its recycling – a combination of the high affinity for the drug and the rapid (less than 1 minute) recycling process likely indicating that it does not contribute significant suramin to the cell (in fact, if it did, as it is 99% of the surface protein, one might expect VSGsur expressing cells to be less resistant to the drug).

We would also note, however, that there are conflicting models of where and how suramin is exerting toxic effects. As we note in the text:

Genetic studies coupled with examination of the trypanosome's single lysosome suggest that suramin accumulates in this compartment, while other evidence links suramin toxicity to effects on the glycosome and impairment of cytokinesis<sup>19,20</sup>.

And whether suramin accumulates in the lysosome in VSGsur expressing cells remains to be established. Therefore, the lysosome model may or may not have relevance. We try to be open about these uncertainties in the field (how suramin is trafficked and how it exerts its toxicity), and believe our model and observations provide paths to probing some of these unresolved issues.

- (2) In the first scenario, the VSG half-life of VSGsur should be shorter in the presence of suramin compared with in its absence. Have the authors investigated VSG half-life in these different scenarios? One could speculate that the binding of VSGsur to suramin might affect how it is treated by the VSG recycling machinery and its rate of degradation.**

To date, we have not made any attempts to measure the half-life of VSGsur in trypanosomes.

- (3) I think that these studies looking at how different ligands bind VSGs could give facinating insight into exactly what is or is not recognised by the VSG quality control mechanism operating during VSG recycling.**

We agree that this opens an entirely new line of inquiry that could prove very fruitful.

- (4) The authors mention that there is no defect in rate of trafficking in the VSGsur expressing strains, but I think that rate of trafficking is a separate point from VSG half-life.**

We agree that these are distinct, although possibly coupled values. Our primary focus for measuring the rate of trafficking was to address the model that this rate was altered in VSGsur expressing cells and could explain the resistance phenotype by invoking a lower rate of suramin import. Since the mutants that did not bind suramin do not alter these kinetics, we felt that we could rule this model out.

- (5) A minor point is that I think that the title would be improved if it was a bit more detailed as it is a bit cryptic at the moment. Maybe say what the coat protein is? And the parasite?**

We have changed the title to: "Structure of Trypanosome Coat Protein VSGsur and Function in Suramin Resistance"

**Reviewer #2 (Remarks to the Author):**

We were happy to note that the reviewer described our manuscript as “fascinating,” “logical,” and “very well documented.”

We attempt below to address the reviewer’s points and questions.

- (1) The hypothesis that VSGsur functions as a suramin sponge is interesting. However, I would invite the authors to provide some simple calculations to estimate if this is theoretically possible. Each cell has about  $5 \times 10^6$  VSG-dimers, so each cell can bind at most the same amount of suramin. If in theory the order of magnitude were feasible, then it should be possible to titrate the resistance to a threshold value that could be calculated from the cell concentration (ignoring binding constants etc.).**

We thank the reviewer for suggesting we bring more quantitation to our resistance model. Following this recommendation, we have reworked considerably the presentation of this model for how VSGsur binding suramin contributes to resistance (Figure 5 still unchanged, however, as the mechanism is not altered). We have dropped the “sponge” description (although still consider it useful, but potentially confusing as not well-defined) in favor of simply describing how newly synthesized VSGsur could bind internalized suramin from other pathways (e.g., ISG75 and LDL) and prevent its trafficking in the cell (to wherever toxicity is exerted – something not yet established). We show that using known rates of VSG synthesis and suramin internalization, we can account for the resistance levels (e.g., IC50 values) we are measuring. Excerpting this from the new Discussion text:

Such a model is in harmony with the known parameters of VSG production and suramin uptake. For example, cells expressing VSG2 treated with a 200 nM dose of suramin accumulate an intracellular concentration of 1.8  $\mu\text{M}$  suramin within 15 minutes, finally plateauing at a concentration 2-3 fold higher. The production rate of newly-synthesized VSG has been estimated as equivalent to between 20,000 and 80,000 VSG monomers per minute. Therefore, with an estimated cell volume of  $\sim 30$  cubic microns, we calculate that there is approximately a 5-20 fold excess of newly synthesized VSGsur available to export receptor-internalized suramin at an extracellular drug concentration of 200 nM (Supplementary Methods). Other considerations aside, this would allow for the cell to clear suramin in a range of extracellular concentrations from 1  $\mu\text{M}$  to 4  $\mu\text{M}$ , very near our measured IC50 of 8.4  $\mu\text{M}$ . Such “other considerations” of course include issues such as the growing contribution of fluid phase import at higher suramin concentrations, the actual toxic levels of suramin in the cell (and, more critically, in what compartments), as well as other unknowns. Nevertheless, this simple model of newly-produced VSGsur serving to bind the imported suramin and shunt it out of the endocytic pathway matches well with what we know about suramin import and VSG dynamics.

A key assumption in this is that the surface-exposed VSG<sub>sur</sub> binds suramin tightly enough that its net contribution to free suramin in the cell is negligible (in other words, VSG<sub>sur</sub> is not a suramin *importer*). We believe this assumption is reasonable due to the high affinity measured for suramin binding to VSG<sub>sur</sub>, the higher concentration inside the cell of suramin than outside (from ISG75 import alone), the fact that the chemical interaction seen in the structure would be predicted to remain strong even if the compartment is acidified, and, perhaps most importantly, because if VSG<sub>sur</sub> did contribute to suramin uptake, the fact that it is 99% of the surface protein, its impact on suramin levels in the cell would dwarf all other known important mechanisms –

therefore, one would expect VSGsur expressing cells to enhance *susceptibility* to suramin, not resistance. Since this is not the case, but the inverse, we believe it is the unbound, newly-synthesized VSGsur trafficking outward and co-mingling with imported suramin that is the key player in resistance.

**(2) The discussion would benefit from being more precise and less speculative. Speculation is fine if it has a factual basis. Interestingly, there are also alternative binding sites in co-crystals, as well as mutations outside the main binding site, which increased resistance to suramine. The authors say that other "factors" are probably involved here. They speak of "supermutants", which is striking but not really scientific. If a replacement mutation does not yield the hoped-for success, it should not be called a "pseudo-clone", because that too is not scientifically useful.**

(1) We described the "alternative binding site" for suramin as a "secondary suramin binding mode." We sought to be careful not to state that there was any clear binding of suramin (and therefore a binding site), as we could not definitively interpret any of the additional, non-protein density in-between the dimers in these crystal soaks. We instead focused on what we could see – that H122 was oriented in a fashion incompatible with suramin binding as described in the only ordered structures we obtained. However, the confusion "secondary suramin binding mode" might cause has led us to remove this phase and replace it with "secondary suramin incubation state for VSGsur." We have reworded the second to make clear that we are convinced that there is a single, biologically relevant binding mode:

A secondary suramin incubation state for VSGsur was also discovered in a minority of the crystals. In this state, H122 adopts the other possible conformer seen in the native structure. This conformation we term "closed" for how it reduces the size of the cavity (Supplementary Fig. 7b). In this closed conformation soak with suramin, the drug cannot occupy the same position as in the open conformation due to steric clash. Consistent with this, suramin does not occupy the binding site. We do observe difference density of a size possibly consistent with a molecule of the size of suramin, but it is positioned differently in a more extended conformation. However, the density is too weak to model with confidence and cannot even definitively be assigned to suramin. We hypothesize that as in the native structure, H122 is able to adopt two conformations, but that the open conformation with the stacking of the histidine rings over the suramin benzene groups leads to the better ordered interaction and thus likely represents the only biological binding mode. The fact that ITC experiments show evidence for only one binding site is consistent with this. The closed conformation still leaves room for suramin perhaps to occupy the cavity, however, and the weak additional density observed in such structures may represent a transient state from solution to the stable binding mode.

Therefore, while still speculative, we felt it was important to present these observations, even if high-resolution information is not available for the drug itself in that state. However, its very weak binding and non-existence by ITC argue that it does not have a strong biological effect, which would be consistent with our hypothesis that it is a transient state on the way to the high-occupancy binding.

(2) “Other factors” for mutations outside the binding site of suramin and speculation: We also felt it was important to present these mutations and their spatial context, even if indeed the statements about them potentially being sites for binding other factors is speculative (although generally speaking, we know that such sites must occur somewhere on VSGsur). However, we

do not see any other way to present the data, as simply stating that there are localized patches of mutations in the populations that possess higher resistance to suramin would likely invite questions about why this should be so. We also cannot add more specificity for “other factors” as there is little understood about the trafficking and toxicity of suramin in the cell, but felt a discussion section afforded some leeway to consider these issues. We hope that the reviewer will agree.

- (3) “Supermutants”: We agree that this is not a precise term, and therefore have removed this word and describe them as “higher resistance mutants” and in similar terms.
- (4) “pseudo-clones”. We use this expression for clones produced by limiting dilution, as this is not a 100% guarantee for a clonal population (in contrast to “real clones” made by microdrop cloning). Therefore, the term is not referring to “yield of mutants” or the VSG-genotype, but whether the population obtained is purely clonal. Because this term is confusing, we have decided to remove it, describing the clones more precisely.

**(3) The kinetic experiments on endocytosis were carried out over a longer period of time, although it is known that the linear measuring range is quite short. The first measurement point of the dextran intake is 10 minutes. Earlier differences in the kinetics are not measured in this way, but this is important for the statement. The method used does not appear to have the resolution required for making sound statements. Therefore, the validity of the data at this point would be questionable.**

The reviewer is correct that the dextran measurements don’t sample earlier time points. However, our intent with the dextran was more general to show no gross problems in trafficking. We have altered the main body of the text to avoid “overselling” the interpretations derived from this assay:

To interrogate this model, we performed endocytosis experiments with blue dextran and bodipy- labeled LDL (Fig. 4, Methods). Our data show that, consistent with previous results<sup>23</sup>, there does not appear to be a VSGsur-specific defect in fluid phase endocytosis. Also consistent with previous results<sup>23</sup>, we do observe that VSGsur cells have a significant decrease in LDL uptake compared to VSG2 (although there is substantial variance among different VSGs, Supplementary Fig. 10).

However, loss-of-binding suramin mutants show no significant alteration in these kinetics (Fig. 4c). Similar results are seen with uptake via the transferrin receptor (Fig. 4d). As these mutants also lose resistance to suramin, it seems that the dynamics of LDL uptake (and thus, presumably, suramin via this pathway) are not strongly coupled to the resistance phenotype in VSGsur. In contrast, the key determinant appears to be the binding of the drug to the VSG.

However, the key experiments are not the dextran, but the LDL and transferrin (especially the LDL pathway for which previous models have proposed a possible defect in suramin trafficking in VSGsur expressing strains). In those experiments, earlier time points were sampled (specifically, early time points

that are identical to the samplings taken in ref23, which is the manuscript wherein the LDL uptake-suramin resistance model was proposed), establishing that there is no such defect and therefore that the model is not likely explanatory for suramin resistance.



**#3 (Remarks to the Author):**

The reviewer describes our manuscript as “elegant” and that they enjoyed reading it, in part for its “honesty” in presenting uncertainty in models of suramin toxicity that “sets the scene for the next chapter.” We also strongly agree, if from a biased perspective, that “increasing the number of solved structures has revealed interesting differences that shed useful light on trypanosome biology” and that pursuing structural work on this class of antigenically distinct surface proteins “is not ‘just one more’; it highlights the flexibility that trypanosomes can achieve in the structure and function of this protein.”

Here we aim to address the “minor points” raised.

- (1) Supplementary figure 1: The schematic drawing is a bit confusing for readers unfamiliar with VSG primary structure. The signal peptide looks huge; the CTD/GPI addition sites are actually separate entities – there is a C-terminal peptide that is cleaved when the GPI is added.**

These points would indeed better the figure, and we have adopted the reviewer’s suggestion. We have lengthened the NTD and CTD regions, shrunk the size of the signal sequence, and added a far C-terminal segment to indicate the portion cleaved upon GPI addition.

- (2) p12: Growth of mutants. The sentence beginning “both mutants were viable....” is confusing. I assume that the growth rate of 8.5h refers to the N130A mutant. The growth of H122A is also supposedly slower. There are standard deviations on the graph. Please include these in the population doubling time to show that there is a significant difference.**

We agree that the sentence was poorly worded and confusing. It now reads:

“Fig. 2 summarizes these results. Both mutants were viable and grew in the absence of the drug, although each evinced a lower growth rate with doubling times of  $8.9\text{h} \pm 0.73$  (N130A) and  $6.9\text{h} \pm 0.18$  (H122A) as compared to  $6.5\text{h} \pm 0.35$  for the wild type (values showing the standard deviation,  $n=6$ , see also Supplementary Fig. 4).”

To compare the curves statistically, we have added the following to the supplementary figure legend:

“For statistical comparisons, we tested whether the slopes and intercepts of the best fit curves were significantly different. For VSGsur and VSGsur +  $0.7\mu\text{M}$  suramin, the differences between the slopes is not significant ( $P$  value = 0.7720). For H122A and D130A (without suramin) compared to VSGsur the differences are statistically significant ( $P < .0113$  and  $P < .0001$ , respectively).”

- (3) Supplementary figure 4. 130A and 122A. It would be preferable to name them according to the mutation e.g.H122A. The figure legend refers to D130A, text to N130A. I assume the latter is correct, since it was designed to destroy the glycosylation site.**

We apologize for this omission and have updated the mutant names of this figure to match those in the rest of the manuscript.

- (4) Supplementary figure 8. The new VSG is flanked by 5'UTR sequences on both sides. Is this really the case or should one of them be 3'UTR?**

This mistake has been corrected. (It should be 3'UTR).

- (5) Supplementary figure 11. Can the authors explain the 2-3x variation in IC50 for replicates of the same cell line?**

The original set of drug sensitivity assays was carried out using a 1:3 dilution scheme. This allowed to test a wider range of drug concentrations but resulted in a poorer resolution and high variation. We have repeated all the drug sensitivity tests with a 1:2 dilution scheme, at least five times, each in duplicate. This resulted in a lower variation and lower p-values ( $p < 0.001$ ; new Figure S11). The conclusion remains the same, i.e. the mutations in VSGsur further decrease suramin sensitivity.

**Reviewer #4 (Remarks to the Author):**

The reviewer found that “details presented in the main-body of the manuscript, the figure legends, supplementary materials section and in the PDB validation reports clearly indicate that all aspects of the X-ray diffraction data collection/reduction, structure determination and refinement procedures have been conducted correctly. The stereochemistry of the three- dimensional models and are very good and are based on careful interpretation of the electron density maps. The conclusions arrived at are valid.”

We thank the reviewer for assessing the quality of the structural work and do not see any further points we need to address.

**Decision Letter, first revision:**

Dear Erec,

Thank you for your patience while your manuscript "Structure of Trypanosome Coat Protein VSGsur

and Function in Suramin Resistance" was under peer review at Nature Microbiology. It has now been seen by our referees, and in the light of their advice I am delighted to say that we can in principle offer to publish it. First, however, we would like you to revise your paper to address the minor points made by reviewer #3, and to ensure that it is in Nature Microbiology format.

Editorially, we will need you to make some changes so that the paper complies with our Guide to Authors at <http://www.nature.com/nmicrobiol/info/gta>.

Nature Microbiology offers a transparent peer review option for new original research manuscripts submitted from 1st December 2019. We encourage increased transparency in peer review by publishing the reviewer comments, author rebuttal letters and editorial decision letters if the authors agree. Such peer review material is made available as a supplementary peer review file. **Please state in the cover letter 'I wish to participate in transparent peer review' if you want to opt in, or 'I do not wish to participate in transparent peer review' if you don't.** Failure to state your preference will result in delays in accepting your manuscript for publication.

Please note: we allow redactions to authors' rebuttal and reviewer comments in the interest of confidentiality. If you are concerned about the release of confidential data, please let us know specifically what information you would like to have removed. Please note that we cannot incorporate redactions for any other reasons. Reviewer names will be published in the peer review files if the reviewer signed the comments to authors, or if reviewers explicitly agree to release their name. For more information, please refer to our [FAQ page](https://www.nature.com/documents/nr-transparent-peer-review.pdf).

I appreciate this email is long and recommend that you print it and use it as a checklist, reading it carefully to the end, in order to avoid delays to publication down the line.

Please note that we will be considering your paper for publication as an ARTICLE in our pages.

Specific points:

In particular, while checking through the manuscript and associated files, we noticed the following specific points which we will need you to address:

1. Main text display items and supplementary information. Please note that we have recently started publishing additional figures as "Extended Data". These figures appear online in the html version of the manuscript in the place they are referred to and greatly increase discoverability of the data that is presented in them.

All Supplementary Information must be submitted in accordance with the instructions in the attached Inventory of Supporting Information, and should fit into one of three categories: EXTENDED DATA (ED); SUPPLEMENTARY INFORMATION (SI); and SOURCE DATA. Below are detailed instructions on how to format each category. For your paper, we suggest that you do the following:

a. Main figures: please maintain the current 5 main figures that illustrate the main findings of the paper.

b. Extended data (ED): please convert 10 SI figures into ED figures. These are an integral part of the paper (presented online in the online version) and are meant to be multipanel A4 size figures. More information on file formats and how the legends should be supplied can be found below and in the attached Inventory of Supporting Information.

c. Supplementary information (SI): your study will have the 'Supplementary online data' as SI. Please submit all SI as a separate pdf file. All supplementary materials need to be assembled into a single file, including all tables (excluding those that are excessively large). In the Supplementary Information file, figure legends should be immediately below each figure and the pages should be numbered.

d. Source data: this format should be used to display source data linked to the main figures and ED figures.

We strongly encourage you include as much additional raw data underlying the graphs in the main and ED figures as possible. These data should be supplied as Excel tables, one file per main or ED figure, and should be clearly labeled and presented in a way that individual experiments are identifiable (for example, across a time course if applicable).

2. Data Availability statement. The data availability statement should clearly refer to all of the source data provided in the manuscript (more instructions on how to write this section can be found in the general formatting guidelines below). Please ensure that datasets deposited in public repositories are now publicly accessible, and that accession codes or DOI are provided in the "Data Availability" section. As long as these datasets are not public, we cannot proceed with the acceptance of your paper.

3. Reporting checklist. Please revise this document according to the instructions found in the annotated PDF attached to this message and send in a final version with your article. The final reporting checklist will be published with your manuscript.

4. Competing interest statement. The competing interest statement needs to be included in the manuscript text (before or after the Acknowledgements).

5. ORCID. We now require corresponding authors to provide an ORCID identifier, and would ask that you please provide one with your final submission (please also see below). There is a step during the upload of the information to our online system in which the number can be introduced.

6. Replicates and statistics. While carefully checking the figures, we noted a few things that need to be revised so that they comply with our style guidelines and accurately report on the number of replicates, statistical testing, etc. As general rules, please note that:

General comments:

Wherever statistics have been derived (e.g., error bars, box plots, statistical significance), the legend needs to provide and define the n number (i.e., the sample size used to derive statistics) as a precise value (not a range), using the wording "n=X biologically independent samples/animals/independent experiments," etc. as applicable.

All error bars need to be defined in the legends (e.g., SD, SEM) together with a measure of centre (e.g. mean, median), and should be accompanied by their precise n number defined as noted above.

All violin plots need to be defined in the legends in terms of minima, maxima, centre, and percentiles, and should be accompanied by their precise n number defined as noted above.

The figure legends must indicate the statistical test used and if applicable, whether the test was one- or two-sided. A description of any assumptions or corrections such as tests of normality and adjustment for multiple comparisons must also be included.

For null hypothesis testing, please indicate the test statistic (e.g.,  $F$ ,  $t$ ,  $r$ ) with confidence intervals, effect sizes, degrees of freedom and  $P$  values noted.

Test results (e.g.,  $p$ -values,  $q$ -values) should be given as exact values whenever possible and appropriate, and confidence intervals noted.

Please indicate how estimates of effect sizes were calculated (e.g., Cohen's  $d$ , Pearson's  $r$ ).

Please state in the legends how many times each experiment was repeated independently with similar results. This is needed for all experiments but is particularly important wherever representative experiments are shown. If space in the legends is limiting, this information can be included in a section titled "Statistics and Reproducibility".

For all bar graphs, the corresponding dot plot must be overlaid.

Specific comments to address:

Please see the attached "Extended\_comments" file.

General points:

Please read carefully through all of the following general formatting points when preparing the final version of your manuscript, as submitting the manuscript files in the required format will greatly speed the process to final acceptance of your work.

Titles should give an idea of the main finding of the paper and ideally not exceed 90 characters (including spaces). We discourage the use of active verbs and do not allow punctuation.

The paper's summary paragraph (about 150-200 words; no references) should serve both as a general introduction to the topic, and as a brief, non-technical summary of your main results and their implications. It should start by outlining the background to your work (why the topic is important) and the main question you have addressed (the specific problem that initiated your research), before going on to describe your new observations, main conclusions and their general implications. Because we hope that scientists across the wider microbiology community will be interested in your work, the first paragraph should be as accessible as possible, explaining essential but specialised terms concisely. We suggest you show your summary paragraph to colleagues in other fields to uncover any problematic concepts.

We strongly support public availability of data. Please place the data used in your paper into a public

data repository, if one exists, or alternatively, present the data as Source Data or Supplementary Information. If data can only be shared on request, please explain why in your Data Availability Statement, and also in the correspondence with your editor. For some data types, deposition in a public repository is mandatory - more information on our data deposition policies and available repositories can be found at <https://www.nature.com/nature-research/editorial-policies/reporting-standards#availability-of-data>.

Please include a data availability statement as a separate section after Methods but before references, under the heading "Data Availability". This section should inform readers about the availability of the data used to support the conclusions of your study. This information includes accession codes to public repositories (data banks for protein, DNA or RNA sequences, microarray, proteomics data etc...), references to source data published alongside the paper, unique identifiers such as URLs to data repository entries, or data set DOIs, and any other statement about data availability. At a minimum, you should include the following statement: "The data that support the findings of this study are available from the corresponding author upon request", mentioning any restrictions on availability. If DOIs are provided, we also strongly encourage including these in the Reference list (authors, title, publisher (repository name), identifier, year). For more guidance on how to write this section please see:

<http://www.nature.com/authors/policies/data/data-availability-statements-data-citations.pdf>

Please supply the figures as vector files - EPS, PDF, AI or postscript (PS) file formats (not raster or bitmap files), preferably generated with vector-graphics software (Adobe Illustrator for example). Try to ensure that all figures are non-flattened and fully editable. All images should be at least 300 dpi resolution (when figures are scaled to approximately the size that they are to be printed at) and in RGB colour format. Please do not submit Jpeg or flattened TIFF files. Please see also 'Guidelines for Electronic Submission of Figures' at the end of this letter for further detail.

Please view [http://www.nature.com/authors/editorial\\_policies/image.html](http://www.nature.com/authors/editorial_policies/image.html) for more detailed guidelines.

We will edit your figures/tables electronically so they conform to Nature Microbiology style. If necessary, we will re-size figures to fit single or double column width. If your figures contain several parts, the parts should be labelled lower case a, b, and so on, and form a neat rectangle when assembled.

Please check the PDF of the whole paper and figures (on our manuscript tracking system) VERY CAREFULLY when you submit the revised manuscript. This will be used as the 'reference copy' to make sure no details (such as Greek letters or symbols) have gone missing during file-transfer/conversion and re-drawing.

All Supplementary Information must be submitted in accordance with the instructions in the attached Inventory of Supporting Information, and should fit into one of three categories:

1. EXTENDED DATA: Extended Data are an integral part of the paper and only data that directly contribute to the main message should be presented. These figures will be integrated into the full-text HTML version of your paper and will be appended to the online PDF. There is a limit of 10 Extended Data figures, and each must be referred to in the main text. Each Extended Data figure should be of the same quality as the main figures, and should be supplied at a size that will allow both the figure and legend to be presented on a single legal-sized page. Each figure should be submitted as an

individual .jpg, .tif or .eps file with a maximum size of 10 MB each. All Extended Data figure legends must be provided in the attached Inventory of Accessory Information, not in the figure files themselves.

2. SUPPLEMENTARY INFORMATION: Supplementary Information is material that is essential background to the study but which is not practical to include in the printed version of the paper (for example, video files, large data sets and calculations). Each item must be referred to in the main manuscript and detailed in the attached Inventory of Accessory Information. Tables containing large data sets should be in Excel format, with the table number and title included within the body of the table. All textual information and any additional Supplementary Figures (which should be presented with the legends directly below each figure) should be provided as a single, combined PDF. Please note that we cannot accept resupplies of Supplementary Information after the paper has been formally accepted unless there has been a critical scientific error.

All Extended Data must be called out in your manuscript and cited as Extended Data 1, Extended Data 2, etc. Additional Supplementary Figures (if permitted) and other items are not required to be called out in your manuscript text, but should be numerically numbered, starting at one, as Supplementary Figure 1, not SI1, etc.

3. SOURCE DATA: We strongly encourage you to provide source data for your figures whenever possible. Full-length, unprocessed gels and blots must be provided as source data for any relevant figures, and should be provided as individual PDF files for each figure containing all supporting blots and/or gels with the linked figure noted directly in the file. Numerical source data that underlie graphs are required for in vivo experiments and strongly encouraged generally. They should be provided in Excel format, one file for each relevant figure, with the linked figure noted directly in the file. They should be clearly labelled such that individual experiments and/or animals are labelled (for example, across a time course if applicable). For imaging source data, we encourage deposition to a relevant repository, such as figshare (<https://figshare.com/>) or the Image Data Resource (<https://idr.openmicroscopy.org>).

Please ensure that you retain unprocessed data and metadata files after publication, ideally archiving data in perpetuity, as these may be requested during the peer review and production process or after publication if any issues arise.

Please include any references for the Methods at the end of the reference list. Any citations in the Supplemental Information will need inclusion in a separate SI reference list.

It is a condition of publication that you include a statement before the acknowledgements naming the author to whom correspondence and requests for materials should be addressed.

Finally, we require authors to include a statement of their individual contributions to the paper -- such as experimental work, project planning, data analysis, etc. -- immediately after the acknowledgements. The statement should be short, and refer to authors by their initials. For details please see the Authorship section of our joint Editorial policies at [http://www.nature.com/authors/editorial\\_policies/authorship.html](http://www.nature.com/authors/editorial_policies/authorship.html)

We will not send your revised paper for further review if, in the editors' judgement, the referees'

comments on the present version have been addressed. If the revised paper is in Nature Microbiology format, in accessible style and of appropriate length, we shall accept it for publication immediately.

Please resubmit electronically

- \* the final version of the text (not including the figures) in either Word or Latex.
- \* publication-quality figures. For more details, please refer to our Figure Guidelines, which is available here: <https://www.nature.com/documents/NRJs-guide-to-preparing-final-artwork.pdf>
- \* Extended Data & Supplementary Information, as instructed
- \* a point-by-point response to any issues raised by our referees and to any editorial suggestions.
- \* any suggestions for cover illustrations, which should be provided at high resolution as electronic files. Please note that such pictures should be selected more for their aesthetic appeal than for their scientific content. I am sure you will understand that we cannot make any promise as to whether any of your suggestions might be selected for the cover of Nature Microbiology.

Please use the following link to access your home page:

{REDACTED}

- \* This url links to your confidential homepage and associated information about manuscripts you may have submitted or be reviewing for us. If you wish to forward this e-mail to co-authors, please delete this link to your homepage first.

Please also send the following forms as a PDF by email to [microbiology@nature.com](mailto:microbiology@nature.com).

- \* Please sign and return the <http://www.nature.com/documents/snl-ltp.docx> target="\_blank">Licence to Publish form</a> .

- \* Or, if the corresponding author is either a Crown government employee (including Great Britain and Northern Ireland, Canada and Australia), or a US Government employee, please sign and return the <http://www.nature.com/documents/snl-ltp-crown.docx> target="\_blank"> Licence to Publish form for Crown government employees</a>, or a <http://www.nature.com/documents/snl-ltp-govus.docx> target="\_blank"> Licence to Publish form for US government employees</a>.

- \* Should your Article contain any items (figures, tables, images, videos or text boxes) that are the same as (or are adaptations of) items that have previously been published elsewhere and/or are owned by a third party, please note that it is your responsibility to obtain the right to use such items and to give proper attribution to the copyright holder. This includes pictures taken by professional photographers and images downloaded from the internet. If you do not hold the copyright for any such item (in whole or part) that is included in your paper, please complete and return this <http://www.nature.com/documents/thirdpartyrights-origes.doc> target="\_blank">Third Party Rights Table</a>, and attach any grant of rights that you have collected.



For more information on our licence policy, please consult <http://npg.nature.com/authors>.

**ORCID**

Nature Microbiology is committed to improving transparency in authorship. As part of our efforts in this direction, we are now requesting that all authors identified as 'corresponding author' create and link their Open Researcher and Contributor Identifier (ORCID) with their account on the Manuscript Tracking System (MTS) prior to acceptance. ORCID helps the scientific community achieve unambiguous attribution of all scholarly contributions. For more information please visit <http://www.springernature.com/orcid>

For all corresponding authors listed on the manuscript, please follow the instructions in the link below to link your ORCID to your account on our MTS before submitting the final version of the manuscript. If you do not yet have an ORCID you will be able to create one in minutes.  
<https://www.springernature.com/gp/researchers/orcid/orcid-for-nature-research>

IMPORTANT: All authors identified as 'corresponding author' on the manuscript must follow these instructions. Non-corresponding authors do not have to link their ORCIDs but are encouraged to do so. Please note that it will not be possible to add/modify ORCIDs at proof. Thus, if they wish to have their ORCID added to the paper they must also follow the above procedure prior to acceptance.

To support ORCID's aims, we only allow a single ORCID identifier to be attached to one account. If you have any issues attaching an ORCID identifier to your MTS account, please contact the [Platform Support Helpdesk](http://platformsupport.nature.com/).

Nature Research journals [encourage authors to share their step-by-step experimental protocols](https://www.nature.com/nature-research/editorial-policies/reporting-standards#protocols) on a protocol sharing platform of their choice. Nature Research's Protocol Exchange is a free-to-use and open resource for protocols; protocols deposited in Protocol Exchange are citable and can be linked from the published article. More details can found at [www.nature.com/protocolexchange/about](https://www.nature.com/protocolexchange/about).

We hope that you will support this initiative and supply the required information. Should you have any query or comments, please do not hesitate to contact me.

We hope to hear from you within two weeks; please let us know if the revision process is likely to take longer.

\*\*\*\*\*

Reviewer Expertise:

Referee #1: VSG antigenic variation, trypanosomes

Referee #2: VSG, African trypanosomes

Referee #3: -

Referee #4: X-ray crystallography, suramin structure

Reviewer Comments:

Reviewer #1 (Remarks to the Author):

I felt that the authors responded well to the issues that were raised. I think that it will be a nice submission for Nature Microbiology.

Reviewer #2 (Remarks to the Author):

The authors have addressed all questions raised. The paper is now ready for publications. Well done!

Reviewer #3 (Remarks to the Author):

As reviewer 3 I raised some minor points, not all of which have been addressed completely. It should be trivial to fix these.

1. The schematic diagram has been modified.
2. Growth of mutants: can it really be said that mutant H122A grows more slowly than the parental line, given the standard deviations? These, together with the growth curve in Fig S4 make me doubt this. There is, undeniably, a difference in the presence of suramin.
3. Corrected as asked.
4. Fig S8. Two out of three have been corrected to 3'UTR. One is still wrongly labelled.
5. Explained.

Reviewer #4 (Remarks to the Author):

My initial evaluation of the crystal structure determination, refinement and analysis indicated that the experiments were well conducted.

I have no additional comments regarding the crystallographic aspects presented in the manuscript.

Final Decision Letter:

Dear Erec,

I am pleased to accept your Article "Structure of Trypanosome Coat Protein VSGsur and Function in Suramin Resistance" for publication in Nature Microbiology. Thank you for having chosen to submit your work to us and many congratulations.

Before your manuscript is typeset, we will edit the text to ensure it is intelligible to our wide readership and conforms to house style. We look particularly carefully at the titles of all papers to ensure that they are relatively brief and understandable.

The subeditor may send you the edited text for your approval. Once your manuscript is typeset you will receive a link to your electronic proof via email within 20 working days, with a request to make any corrections within 48 hours. If you have queries at any point during the production process then please contact the production team at [rjsproduction@springernature.com](mailto:rjsproduction@springernature.com). Once your paper has been scheduled for online publication, the Nature press office will be in touch to confirm the details.

Please note that you will probably be contacted by the production team as the manuscript figures still displayed incorrectly in our system.

Acceptance of your manuscript is conditional on all authors' agreement with our publication policies (see [www.nature.com/nmicrobiolate/authors/gta/content-type/index.html](http://www.nature.com/nmicrobiolate/authors/gta/content-type/index.html)). In particular your manuscript must not be published elsewhere and there must be no announcement of the work to any media outlet until the publication date (the day on which it is uploaded onto our website).

The Author's Accepted Manuscript (the accepted version of the manuscript as submitted by the author) may only be posted 6 months after the paper is published, consistent with our [self-archiving embargo](http://www.nature.com/authors/policies/license.html). Please note that the Author's Accepted Manuscript may not be released under a Creative Commons license. For Nature Research Terms of Reuse of archived manuscripts please see: <http://www.nature.com/authors/policies/license.html#terms>

If you have posted a preprint on any preprint server, please ensure that the preprint details are updated with a publication reference, including the DOI and a URL to the published version of the article on the journal website.

An online order form for reprints of your paper is available at <https://www.nature.com/reprints/author-reprints.html>. All co-authors, authors' institutions and authors' funding agencies can order reprints using the form appropriate to their geographical region.

We welcome the submission of potential cover material (including a short caption of around 40 words) related to your manuscript; suggestions should be sent to Nature Microbiology as electronic files (the image should be 300 dpi at 210 x 297 mm in either TIFF or JPEG format). Please note that such pictures should be selected more for their aesthetic appeal than for their scientific content, and that colour images work better than black and white or grayscale images. Please do not try to design a cover with the Nature Microbiology logo etc., and please do not submit composites of images related to your work. I am sure you will understand that we cannot make any promise as to whether any of your suggestions might be selected for the cover of the journal.

You can now use a single sign-on for all your accounts, view the status of all your manuscript submissions and reviews, access usage statistics for your published articles and download a record of your refereeing activity for the Nature journals.

To assist our authors in disseminating their research to the broader community, our SharedIt initiative provides you with a unique shareable link that will allow anyone (with or without a subscription) to read the published article. Recipients of the link with a subscription will also be able to download and print the PDF.

As soon as your article is published, you will receive an automated email with your shareable link.

Congratulations once again and I look forward to seeing the article published.
